# Supplementary material for: Cx26 knockout predisposes the mammary gland to primary mammary tumors in a DMBA-induced mouse model of breast cancer
Source: PubMed Central journal article supplement (PMC4741923; doi:10.18632/oncotarget.5953), 2015-10-02
Supplement: oncotarget-06-37185-s001.pdf [file oncotarget-06-37185-s001.pdf]

# Cx26 knockout predisposes the mammary gland to primary mammary tumors in a DMBA-induced mouse model of breast cancer

## Supplementary Material

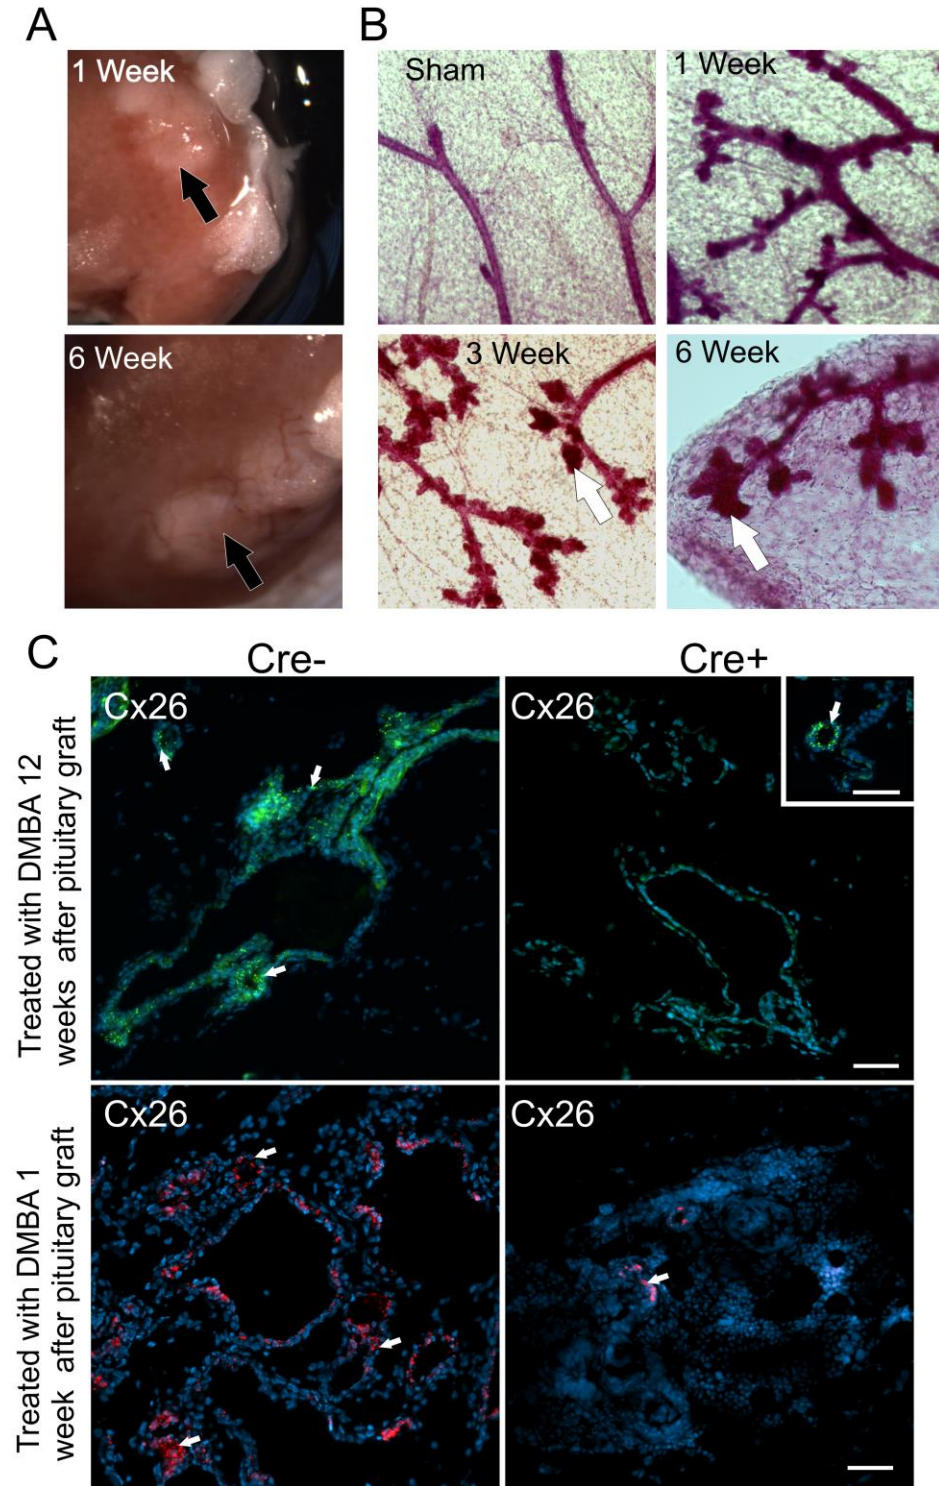

**SFig 1. Pituitary implantation stimulates BLG that results in Cx26 knockout within the mammary gland.** (A, B) Pituitaries were implanted in the renal capsule leading to the development of alveoli in the mammary gland which began to be seen 3 weeks following pituitary transplant but was more evident at 6 weeks. (C) At the time of sacrifice, immunofluorescence revealed considerable but not complete (insert) knockout of Cx26 (green/red, arrows) in the mammary gland of BLG-Cre; Cx26<sup>fl/fl</sup> mice (Cre+), unlike Cx26<sup>fl/fl</sup> control mice (Cre-) of both mice treated with DMBA 1 and 12 weeks after pituitary transplant. Hoechst denotes nuclei. Scale bars = 50  $\mu$ m. N $\geq$ 6.

**STable1. List of Mice used in study for mice treated with DMBA or oil by gavage 12 weeks following pituitary transplant.**

|                                                                                                                                                    | Oil  |      | DMBA |      |
|----------------------------------------------------------------------------------------------------------------------------------------------------|------|------|------|------|
|                                                                                                                                                    | Cre- | Cre+ | Cre- | Cre+ |
| Group 1<br>DMBA-treated Following Cx26<br>Knockdown                                                                                                |      |      |      |      |
| Initial N-Value For Study                                                                                                                          | 7    | 7    | 16   | 12   |
| # of Mice Removed from<br>Study to date for other Health<br>Concerns<br>- Lymphoma<br>- Intestinal Tumour<br>- Blood Clot<br>- Enlarged Lymph Node | 0    | 0    | 4    | 3    |
| Total # of Mice Included in<br>Study                                                                                                               | 7    | 7    | 12   | 9    |
| Total # of Mice with Mammary<br>Tumours                                                                                                            | 0    | 0    | 4    | 8    |

**STable2. List of Mice used in study for mice treated with DMBA or oil by gavage 1 week following pituitary transplant.**

|                                                                                                                        | Oil  |      | DMBA |      |
|------------------------------------------------------------------------------------------------------------------------|------|------|------|------|
|                                                                                                                        | Cre- | Cre+ | Cre- | Cre+ |
| Group 2<br>DMBA-Treated Prior to Cx26<br>Knockdown                                                                     |      |      |      |      |
| Initial N-Value For Study                                                                                              | 10   | 10   | 10   | 10   |
| # of Mice Removed from<br>Study to date for other Health<br>Concerns<br>- Lymphoma<br>- Intestinal Tumour<br>- Unknown | 2    | 2    | 3    | 3    |
| Total # of Mice Included in<br>Study                                                                                   | 8    | 8    | 7    | 7    |
| Total # of Mice with Mammary<br>Tumours                                                                                | 0    | 0    | 7    | 7    |
